# Supplementary material for: Intermixing the OPN1LW and OPN1MW Genes Disrupts the Exonic Splicing Code Causing an Array of Vision Disorders
Source: MDPI journal article supplement (doi:10.3390/genes12081180), 2021-07-29
Supplement: s1 [file s1]

**Table S1.** LIAVA haplotype and arrays that cause blue cone monochromacy.

| Subject ID     | Age (yr) | Genotype                                                   | SER<br>OD | SER<br>OS | BCVA   |
|----------------|----------|------------------------------------------------------------|-----------|-----------|--------|
| *BCM73-20770   | 0.25     | M <sub>LIAVA</sub>                                         | -8        | -9        | 20/100 |
| *BCM73-20537   | 3        | M <sub>LIAVA</sub>                                         | -4        | -4        | 20/100 |
| S16            | 10       | L <sub>LIAVA</sub> -L <sub>LIAVA</sub> -M <sub>MVVVA</sub> | <-6 D     | <-6 D     | 20/60  |
| *MOL0057 III:3 | 12       | M <sub>LIAVA</sub>                                         | -6        | -6        | 20/160 |
| BCM72-17075    | 12       | L <sub>LIAVA</sub> -M <sub>LIAVA</sub> -M <sub>MVVVA</sub> | 0.5       | 0.5       | 20/200 |
| *BCM73-17481   | 14       | M <sub>LIAVA</sub>                                         | -14       | -14       | 20/400 |
| BCM93-19164    | 14       | M <sub>LIAVA</sub>                                         | -5        | -3        | 20/67  |
| S17            | 18       | L <sub>LIAVA</sub> -L <sub>LIAVA</sub> -M <sub>MVVVA</sub> | <-6 D     | <-6 D     | 20/40  |
| *MOL0057 III:I | 20       | M <sub>LIAVA</sub>                                         | -18       | -18       | 20/320 |
| MM_0155        | 30       | L <sub>LIAVA</sub> - M <sub>LIAVA</sub>                    | ND        | ND        | ND     |
| *BCM73-16953   | 51       | M <sub>LIAVA</sub>                                         | -12       | -12       | 20/133 |
| S21            | 73       | L <sub>LIAVA</sub>                                         | <-6 D     | <-6 D     | 20/200 |

\*BCM73-20770, BCM73-20537, BCM73-16953 are relatives, see reference [1] for pedigree. MOL0057 III:3 and III:I are relatives, see reference 15 for pedigree. Subjects with IDs starting with BCM are from reference [1], those starting with S are from reference [2], those starting with MOL are from reference [3]. MM\_0155 is from reference [4].

**Table S2.** LIAVA haplotype and arrays that cause red-green color vision defects.

| Subject ID     | Age (yr) | Color vision | Genotype                                 | SER OD | SER OS | BCVA OD | BCVA OS | Photopic ERG |
|----------------|----------|--------------|------------------------------------------|--------|--------|---------|---------|--------------|
| *MOL0152 III:2 | 5        | ND           | LLIAVA - M <sub>MVVVA</sub>              | -5.5   | -6.5   | 20/100  | 20/200  | reduced      |
| *MOL0152 III:3 | 5        | ND           | LLIAVA - M <sub>MVVVA</sub>              | -8     | -8.75  | 20/67   | 20/50   | reduced      |
| BCM160-23130   | 6        | impaired     | LLIAVA - M <sub>MVVVA</sub>              | -3.75  | -5     | 20/67   | 20/40   | reduced      |
| *MOL0152 III:1 | 7        | ND           | LLIAVA - M <sub>MVVVA</sub>              | -9.25  | -9.5   | 20/40   | 20/50   | reduced      |
| ZD314-18057    | 10       | impaired     | LLIAVA - M <sub>MVVVA</sub>              | -6.5   | -6     | 20/100  | 20/100  | reduced      |
| JC_0609        | 11       | Protanope    | LLIAVA - M <sub>MVVVA</sub>              | -14    | -13.75 | 20/20   | 20/20   | ND           |
| BCM51-12359    | 12       | impaired     | LLIAVA - M <sub>MVVVA</sub>              | -14.5  | -14.5  | 20/100  | 20/100  | reduced      |
| MM_0142        | 13       | Protanope    | LLIAVA - M <sub>MVVVA</sub>              | -2     | -2     | ND      | ND      | ND           |
| *MM_0145       | 15       | Protanope    | M <sub>LLIAVA</sub> - M <sub>MVVVA</sub> | 0      | 0      | 20/20   | 20/30   | ND           |
| *MM_0144       | 19       | Protanope    | M <sub>LLIAVA</sub> - M <sub>MVVVA</sub> | -8     | -8.25  | 20/70   | 20/40   | ND           |
| JC_0196        | 28       | Protanope    | LLIAVA-M <sub>MVVVA</sub> -M             | -6     | -5     | 20/40   | 20/40   | ND           |
| JC_0195        | 29       | Protanope    | LLIAVA-M <sub>MVVVA</sub> -M             | -11.5  | -12    | 20/60   | 20/60   | ND           |
| JC_0084        | 38       | Deutanope    | L - M <sub>LLIAVA</sub>                  | -2.5   | -2.5   | 20/20   | 20/15   | ND           |

\*MOL0512 III:2, III:3, III:1 are relatives; see reference [3] for pedigree; MM\_0145 and MM\_0144 are brothers, JC\_0195 and JC\_0196 are brothers, the genotype of MM\_0145 not done, presumed to be same as his brother. Subject IDs starting with MOL are from reference [3], those starting with BCM or ZD are from reference [1], those starting with MM or JC are from references [4,5]. ND = not done.

**Table S3.** MIAVA haplotype and arrays that cause red-green color vision defects.

| Subject ID   | Age (yr) | Genotype              | SER<br>OD | SER<br>OS | BCVA   |
|--------------|----------|-----------------------|-----------|-----------|--------|
| BCM101-19818 | 3        | LLIAVA-MMIAVA         | -6        | -6        | 20/200 |
| *ZD379-19195 | 7        | LLIAVA-MMIAVA         | 1         | 1         | 20/125 |
| *S22         | 9        | LLIAVA- LMIAVA-MMIAVA | <-6 D     | <-6 D     | 20/125 |
| *ZD379-19194 | 12       | LLIAVA-MMIAVA         | ND        | ND        | 20/125 |
| *S23         | 68       | LLIAVA- LMIAVA-MMIAVA | >-3D      | >-3D      | 20/200 |
| *S24         | 34       | LMIAVA- LMIAVA-MMVVVA | <-6 D     | <-6 D     | 20/80  |
| *S25         | 51       | LMIAVA- LMIAVA-MMVVVA | <-6 D     | <-6 D     | 20/63  |

Subjects ZD379-19195, -19194 are relatives; see pedigree in reference [1]. Subjects S22 and S23 are relatives, and S24 and S25 are relatives, see pedigrees in reference [2]. Subjects' IDs starting with BCM or ZD are from reference [1], those beginning with S are from reference[2].

**Table S4.** LVAVA haplotype and red-green color vision deficiency.

| Subject ID    | Age Yrs | Color Vision | Diag.   | Genotype                                    | AL OD | AL OS | SER OD | SER OS | BCVA   | Pho-<br>topic<br>ERG |
|---------------|---------|--------------|---------|---------------------------------------------|-------|-------|--------|--------|--------|----------------------|
| BCM194-25474  | 5       | NV           | BCM     | LLVAVA                                      | ND    | ND    | -16    | -16.25 | 20/40  | re-<br>duced         |
| S18           | 10      | I            | XLCD    | LLVAVA                                      | ND    | ND    | <-6D   | <-6D   | 20/50  | re-<br>duced         |
| *JC_11445     | 26      | D            | XLCD    | LLVAVA – LMVVVA – M – M                     | 25.79 | 25.65 | ND     | ND     | ND     | ND                   |
| *JC_0758      | 33      | DA           | XLCD    | LLVAVA – LMVVVA – M – M                     | 29.18 | 28.53 | -12.75 | -10.00 | 20/50  | ND                   |
| JC_0347       | 33      | D            | XLICD   | LLVAVA                                      | 24.77 | 24.25 | -3.3   | -2     | 20/200 | ND                   |
| JC_0683       | 36      | DA           | XLCD    | LLVAVA – LMVVVA – M – M                     | 27.03 | 26.70 | -8.5   | -8.5   | 20/15  | ND                   |
| BCM66-16407   | 41      | I            | BCM     | LLVAVA                                      | ND    | ND    | -13    | -14    | 20/67  | absent               |
| S26           | 80      | I            | XLCD    | LLVAVA-LLVAVA-M <sub>MVVVA</sub>            | ND    | ND    | >-3 D  | >-3 D  | 20/125 | re-<br>duced         |
| *BCM112-22852 | 6       | I            | BCM/CRD | M <sub>LVAVA</sub>                          | ND    | ND    | -9     | -9.25  | 20/67  | re-<br>duced         |
| *JC_0451      | 12      | P            | XLCD    | M <sub>LVAVA</sub> – M – M                  | 28.1  | 27.6  | -9.5   | -9     | 20/20  | ND                   |
| *JC_0448      | 14      | P            | XLCD    | M <sub>LVAVA</sub> – M – M                  | 27.75 | 27.51 | -11.5  | -10.75 | 20/25  | ND                   |
| *BCM112-23518 | 14      | I            | BCM/CRD | M <sub>LVAVA</sub>                          | ND    | ND    | -24    | -23    | 20/125 | re-<br>duced         |
| *JC_0447      | 17      | P            | XLCD    | M <sub>LVAVA</sub> – M – M                  | 26.54 | 26.52 | -9.75  | -9     | 20/20  | ND                   |
| *JC_10340     | 32      | P            | XLCD    | M <sub>LVAVA</sub> – M <sub>MVVVA</sub> – M | 28.96 | 28.08 | -17.5  | -13    | 20/20  | ND                   |
| S19           | 40      | I            | XLCD    | M <sub>LVAVA</sub>                          | ND    | ND    | <-6D   | <-6D   | 20/80  | re-<br>duced         |
| JC_0564       | 45      | P            | XLICD   | M <sub>LVAVA</sub>                          | 27.08 | 26.58 | -5.8   | -4.9   | 20/100 | re-<br>duced         |
| S20           | 49      | I            | XLCD    | M <sub>LVAVA</sub>                          | ND    | ND    | <-6D   | <-6D   | 20/63  | re-<br>duced         |

\*JC\_11445 and JC\_11445 are brothers; JC\_0683 and JC\_0758 are cousins; JC\_0451, JC\_0448, and JC\_0447 are brothers and JC\_10340 is their cousin; BCM112-22852 and BCM112-23518 are from the same family. Subject IDs starting with BCM are from reference [1], subject IDs starting with JC\_ are from references [4,5], subject IDs starting with S are from reference [2]. CRD=cone-rod dystrophy. Color vision test results: NV = test not valid; D = deuteranope, DA = deuteranomalous, P = protanope, I = impaired. Yellow shaded rows = subjects with LVAVA haplotype expressed in all non-S cones.

**Table S5.** LVAVA haplotypes and arrays for normal color vision.

| Subject ID    | Age<br>Yrs | Color Vision | Diag.       | Genotype                    | SER<br>OD | SER<br>OS | BCVA<br>OD | BCVA<br>OS |
|---------------|------------|--------------|-------------|-----------------------------|-----------|-----------|------------|------------|
| *BCM133-23364 | 1          | ND           | BCM         | LLVAVA – M <sub>LVAIA</sub> | -5        | -5        | ND         | ND         |
| *BCM133-20960 | 10         | I            | BCM         | LLVAVA – M <sub>LVAIA</sub> | -5        | -6        | 20/33      | 20/40      |
| *BCM133-20961 | 32         | ND           | BCM         | LLVAVA – M <sub>LVAIA</sub> | -20.75    | -19       | 20/33      | 20/55      |
| *HM346IV:2    | 15         | Normal       | high myopia | LLVAVA – M                  | -11       | -12.25    | 20/20      | 20/30      |
| *HM346III:7   | 27         | ND           | high myopia | LLVAVA – M                  | -12.5     | -12.5     | 20/67      | 20/80      |
| *HM346II:4    | 47         | Normal       | high myopia | LLVAVA – M                  | -13.75    | -14       | 20/200     | 20/125     |
| *HM346II:2    | 54         | ND           | high myopia | LLVAVA – M                  | -18.25    | -16.25    | 20/200     | 20/100     |
| *HM295 IV4    | 6          | Normal       | high myopia | LLVAVA – M                  | -10.5     | -10.5     | ND         | ND         |
| *HM295 IV2    | 12         | Normal       | high myopia | LLVAVA – M                  | -8.25     | -9        | 20/30      | 20/25      |
| *HM295 IV3    | 12         | Normal       | high myopia | LLVAVA – M                  | -9.25     | -9.25     | 20/40      | 20/40      |
| *HM295 IV7    | 14         | Normal       | high myopia | LLVAVA – M                  | -9.25     | -10.25    | 20/30      | 20/30      |
| *HM295 IV1    | 19         | Normal       | high myopia | LLVAVA – M                  | -6        | -6.25     | 20/25      | 20/30      |
| *HM295 IV5    | 31         | Normal       | high myopia | LLVAVA – M                  | -15       | -15       | 20/30      | 20/40      |
| *HM295 II:5   | 76         | Normal       | high myopia | LLVAVA – M                  | ND        | ND        | ND         | ND         |
| BCM126-20616  | 41         | I            | BCM         | LLVAVA-M <sub>LVAIA</sub>   | ND        | ND        | 20/80      | 20/100     |

\*Subject IDs beginning with BCM are from the same reference and BCM133- are from the same family and are from reference [1], subject IDs beginning with HM are from reference [6]. Yellow shaded row = subject expresses LVAVA haplotype in all non-S cones.

**Table S6.** MVAVA haplotype and arrays for normal color vision.

| Subject ID    | Age<br>Yrs | Color<br>Vision | genotype           | AL<br>OD<br>OS | OD<br>SER | OS SER | BCVA OD | BCVA OS | Photopic<br>ERG |
|---------------|------------|-----------------|--------------------|----------------|-----------|--------|---------|---------|-----------------|
| Orosz<br>IV:5 | 40         | ND              | LLVAVA –<br>MMVAVA | 25.16<br>25.51 | -4.25     | -5.25  | 20/20   | 20/20   | ND              |
| Orosz<br>IV:5 | 57         | DA              | LLVAVA –<br>MMVAVA | ND             | NA        | NA     | 20/25   | 20/40   | ND              |
| Orosz<br>IV:5 | 62         | I               | LLVAVA –<br>MMVAVA | ND             | NA        | NA     | 20/25   | 20/40   | absent          |
| Orosz<br>IV:7 | 51         | I               | LLVAVA –<br>MMVAVA | 27.82<br>27.57 | -5.75     | -6.5   | 20/50   | 20/33   | absent          |
| Orosz V:1     | 32         | ND              | LLVAVA –<br>MMVAVA | 31.44<br>30.72 | ND        | ND     | 20/20   | 20/20   | ND              |
| Orosz V:1     | 38         | I               | LLVAVA –<br>MMVAVA | ND             | -20.0     | -18.0  | 20/20   | 20/20   | absent          |
| Orosz V:1     | 46         | I               | LLVAVA –<br>MMVAVA | 33.11<br>32.28 | -21.0     | -19.75 | 20/20   | 20/25   | ND              |
| Orosz<br>VI:3 | 42         | I               | LLVAVA –<br>MMVAVA | 31.35<br>32.49 | -22.5     | -24.5  | 20/20   | 20/20   | ND              |
| Orosz<br>VI:6 | 11         | N               | LLVAVA –<br>MMVAVA | ND             | -6.25     | -6.5   | 20/40   | 20/20   | reduced         |

All subjects are from the same Hungarian family in reference [7]. Color vision: ND = not done; DA = deuteranoma-  
lous, I = impaired, N = normal trichromatic color vision.

**Table S7.** LIAVS haplotype.

| Subject ID        | Age (Yr) | Genotype                 | SER OD | SER OS | BCVA OD | BCVA OS |
|-------------------|----------|--------------------------|--------|--------|---------|---------|
| *MOL0250<br>III:2 | 50       | LLIAVS                   | -2.25  | -1.75  | 20/67   | 20/67   |
| *+MOL0250<br>IV:3 | 24       | LLIAVS                   | -4.00  | -5.50  | 20/67   | 20/67   |
| *+MOL0250<br>IV:3 | 27       | LLIAVS                   | ND     | ND     | 20/67   | 20/67   |
| *+MOL0250<br>IV:3 | 32       | LLIAVS                   | -2.75  | -5.00  | 20/80   | 20/100  |
| MOL0267<br>III:1  | 34       | LLIAVS                   | ND     | ND     | 20/67   | 20/67   |
| BCM72-<br>16874   | 71       | LLIAVS-MLIAVA-<br>MMVVVA | 1.75   | 0.75   | 20/200  | 20/200  |

\*members of the same family; see reference [3] for pedigree. +same individual examined over an 8-year period. BCM72-16874 is from reference [1].

#### References

1. Buena-Atienza, E.; Ruther, K.; Baumann, B.; Bergholz, R.; Birch, D.; De Baere, E.; Dollfus, H.; Greally, M.T.; Gustavsson, P.; Hamel, C.P.; et al. De novo intrachromosomal gene conversion from OPN1MW to OPN1LW in the male germline results in Blue Cone Monochromacy. *Scientific reports* **2016**, *6*, 28253, doi:10.1038/srep28253.
2. Gardner, J.C.; Liew, G.; Quan, Y.H.; Ermetal, B.; Ueyama, H.; Davidson, A.E.; Schwarz, N.; Kanuga, N.; Chana, R.; Maher, E.R.; et al. Three different cone opsin gene array mutational mechanisms with genotype-phenotype correlation and functional investigation of cone opsin variants. *Human mutation* **2014**, *35*, 1354-1362, doi:10.1002/humu.22679.
3. Mizrahi-Meissonnier, L.; Merin, S.; Banin, E.; Sharon, D. Variable retinal phenotypes caused by mutations in the X-linked photopigment gene array. *Investigative Ophthalmology and Visual Science* **2010**, *51*, 3884-3892, doi:doi10.1167/iovs.09-4592
4. Patterson, E.J.; Kalitzeos, A.; Kasilian, M.; Gardner, J.C.; Neitz, J.; Hardcastle, A.J.; Neitz, M.; Carroll, J.; Michaelides, M. Residual Cone Structure in Patients With X-Linked Cone Opsin Mutations. *Invest Ophthalmol Vis Sci* **2018**, *59*, 4238-4248, doi:10.1167/iovs.18-24699.
5. Patterson, E.J.; Wilk, M.; Langlo, C.S.; Kasilian, M.; Ring, M.; Hufnagel, R.B.; Dubis, A.M.; Tee, J.J.; Kalitzeos, A.; Gardner, J.C.; et al. Cone Photoreceptor Structure in Patients With X-Linked Cone Dysfunction and Red-Green Color Vision Deficiency. *Invest Ophthalmol Vis Sci* **2016**, *57*, 3853-3863, doi:10.1167/iovs.16-19608.
6. Li, J.; Gao, B.; Guan, L.; Xiao, X.; Zhang, J.; Li, S.; Jiang, H.; Jia, X.; Yang, J.; Guo, X. Unique variants in OPN1LW cause both syndromic and nonsyndromic X-linked high myopia mapped to MYP1. *Investigative ophthalmology & visual science* **2015**, *56*, 4150-4155.
7. Orosz, O.; Rajta, I.; Vajas, A.; Takacs, L.; Csutak, A.; Fodor, M.; Kolozsvari, B.; Resch, M.; Senyi, K.; Lesch, B.; et al. Myopia and Late-Onset Progressive Cone Dystrophy Associate to LVAVA/MVAVA Exon 3 Interchange Haplotypes of Opsin Genes on Chromosome X. *Invest Ophthalmol Vis Sci* **2017**, *58*, 1834-1842, doi:10.1167/iovs.16-21405.
